# Supplementary material for: Associations of individual and mixtures of organophosphate pesticides with the risk of osteoporosis in adult population
Source: Royal Society of Chemistry journal article supplement (doi:10.1039/d4em00815d), 2025-01-01
Supplement: d4em00815d1.pdf [file d4em00815d1.pdf]

## Contents

|                                                                                                                                                                                                  |   |
|--------------------------------------------------------------------------------------------------------------------------------------------------------------------------------------------------|---|
| <b>Table S1.</b> Sensitivity analysis: Association between WQS regression index and osteoporosis/BMD, NHAES. ....                                                                                | 1 |
| <b>Table S2.</b> Estimates for the causal association of pesticides-exposure and BMD. ....                                                                                                       | 3 |
| <b>Fig S1.</b> Flow chart of exclusion criteria employed in the Study. ....                                                                                                                      | 4 |
| <b>Fig S2.</b> Subgroup analysis by gender: Comparison between different models of the weighted relationship between organophosphate pesticides metabolites in urine and osteoporosis /BMD. .... | 5 |
| <b>Fig S3.</b> Subgroup analysis by age: Comparison between different models of the weighted relationship between organophosphate pesticides metabolites in urine and osteoporosis /BMD. ....    | 6 |
| <b>Fig S4.</b> Subgroup analysis by BMI: Comparison between different models of the weighted relationship between organophosphorus pesticide metabolites in urine and osteoporosis /BMD. ....    | 7 |
| <b>Fig S5.</b> Sensitivity analysis: Result of the Qgcomp model. ....                                                                                                                            | 8 |

**Table S1.** Sensitivity analysis: Association between WQS regression index and osteoporosis/BMD, NHAES.

| outcomes                         | Model I             |             | Model II            |             | Model III           |             |
|----------------------------------|---------------------|-------------|---------------------|-------------|---------------------|-------------|
|                                  | OR/ $\beta$ (95%CI) | <i>P</i>    | OR/ $\beta$ (95%CI) | <i>P</i>    | OR/ $\beta$ (95%CI) | <i>P</i>    |
| Male                             |                     |             |                     |             |                     |             |
| osteoporosis                     | 1.16(0.74,1.82)     | 0.53        | 1.14(0.73,1.79)     | 0.57        | 1.14(0.73,1.78)     | 0.56        |
| FN-BMD                           | -0.01(-0.02,0.00)   | 0.09        | -0.01(-0.02,0.00)   | 0.11        | -0.01(-0.02,0.00)   | 0.08        |
| LS-BMD                           | 0.00(-0.01,0.01)    | 0.69        | 0.00(-0.01,0.01)    | 0.69        | 0.00(-0.01,0.01)    | 0.62        |
| Female                           |                     |             |                     |             |                     |             |
| osteoporosis                     | 1.10(0.47,2.58)     | 0.82        | 1.01(0.42,2.43)     | 0.99        | 1.06(0.44,2.57)     | 0.90        |
| FN-BMD                           | -0.01(-0.03,0.00)   | <b>0.04</b> | -0.02(-0.03,0.00)   | <b>0.03</b> | -0.02(-0.03,0.00)   | <b>0.06</b> |
| LS-BMD                           | -0.02(-0.03,0.00)   | 0.05        | -0.02(-0.03,0.00)   | 0.05        | -0.02(-0.03,0.00)   | 0.07        |
| Age $\geq$ 60                    |                     |             |                     |             |                     |             |
| osteoporosis                     | 1.20(0.87,1.67)     | 0.27        | 1.21(0.87,1.68)     | 0.26        | 1.23(0.88,1.71)     | 0.23        |
| FN-BMD                           | 0.01(-0.02,0.01)    | 0.32        | 0.01(-0.02,0.01)    | 0.28        | 0.01(-0.03,0.01)    | 0.26        |
| LS-BMD                           | -0.01(-0.03,0.02)   | 0.64        | -0.01(-0.03,0.02)   | 0.65        | -0.01(-0.03,0.01)   | 0.46        |
| Age<60                           |                     |             |                     |             |                     |             |
| osteoporosis                     | 1.32(0.93,1.87)     | 0.11        | 1.32(0.93,1.88)     | 0.12        | 1.30(0.91,1.84)     | 0.15        |
| FN-BMD                           | -0.02(-0.02,-0.01)  | <b>0.00</b> | -0.01(-0.02,-0.01)  | <b>0.00</b> | 1.32(0.93,1.87)     | <b>0.00</b> |
| LS-BMD                           | -0.01(-0.02,0.00)   | <b>0.01</b> | -0.01(-0.02,0.00)   | <b>0.01</b> | -0.01(-0.02,0.00)   | <b>0.02</b> |
| BMI $\geq$ 25kg/m <sup>2</sup>   |                     |             |                     |             |                     |             |
| osteoporosis                     | 1.05(0.74,1.49)     | 0.77        | 1.07(0.76, 1.52)    | 0.70        | 1.08(0.76, 1.55)    | 0.66        |
| FN-BMD                           | -0.02(-0.03,-0.01)  | <b>0.00</b> | -0.02(-0.03,-0.01)  | <b>0.00</b> | -0.02(-0.03, -0.01) | <b>0.00</b> |
| LS-BMD                           | -0.02(-0.03, 0.00)  | <b>0.01</b> | -0.02(-0.03, 0.00)  | <b>0.02</b> | -0.02(-0.03, 0.00)  | <b>0.01</b> |
| BMI<25kg/m <sup>2</sup>          |                     |             |                     |             |                     |             |
| osteoporosis                     | 1.17(0.83, 1.66)    | 0.37        | 1.15(0.81, 1.64)    | 0.43        | 1.16(0.81, 1.67)    | 0.41        |
| FN-BMD                           | 0.00(-0.02, 0.01)   | 0.73        | 0.00(-0.02, 0.01)   | 0.73        | 0.00(-0.02, 0.01)   | 0.69        |
| LS-BMD                           | -0.02(-0.03, 0.00)  | <b>0.04</b> | -0.02(-0.03, 0.00)  | <b>0.04</b> | -0.02(-0.03, 0.00)  | <b>0.04</b> |
| Exclusion of medication use      |                     |             |                     |             |                     |             |
| osteoporosis                     | 1.37(1.07,1.75)     | <b>0.04</b> | 1.33(1.04,1.70)     | <b>0.02</b> | 1.33(1.04,1.70)     | <b>0.03</b> |
| FN-BMD                           | -0.01(-0.02,0.00)   | <b>0.00</b> | -0.01(-0.02,0.00)   | <b>0.00</b> | -0.01(-0.02,0.00)   | <b>0.00</b> |
| LS-BMD                           | -0.02(-0.03,-0.01)  | <b>0.00</b> | -0.02(-0.03,-0.01)  | <b>0.00</b> | -0.02(-0.03,-0.01)  | <b>0.00</b> |
| Exclusion of history of fracture |                     |             |                     |             |                     |             |
| osteoporosis                     | 1.23(0.96,1.56)     | 0.10        | 1.23(0.96,1.56)     | 0.10        | 1.21(0.95,1.54)     | 0.12        |
| FN-BMD                           | -0.02(-0.02,-0.01)  | <b>0.00</b> | 1.23(0.96,1.56)     | <b>0.00</b> | 1.23(0.96,1.56)     | <b>0.00</b> |
| LS-BMD                           | -0.01(-0.02,-0.01)  | <b>0.00</b> | -0.01(-0.02,-0.01)  | <b>0.00</b> | -0.01(-0.02,-0.01)  | <b>0.00</b> |

FN-BMD: femoral neck bone mineral density; LS-BMD: lumbar spine bone mineral density;  $\beta$  estimates represents mean differences in BMD when the WQS index was increased by one quartile; OR: odds ratio; 95%CI: 95% Confidence interval.

Model I: Adjusting for age, sex, race, education level, marital status, FIR, and BMI.

Model II: Model I + adjusted for smoking and drinking.

Model III: Model II + adjusted for hypertension, diabetes, and cardiovascular diseases.

**Table S2.** Estimates for the causal association of pesticides-exposure and BMD.

| exposure                | outcome | SNPs | Method          | OR(95%CI)           | <i>P</i> | Heterogeneity | Pleiotropy         |           |
|-------------------------|---------|------|-----------------|---------------------|----------|---------------|--------------------|-----------|
|                         |         |      |                 |                     |          |               | MR-Egger intercept | MR-PRESSO |
| Worked with pesticides: | FN-BMD  | 5    | IVW             | 1.23(0.62,2.43)     | 0.627    |               |                    |           |
|                         |         |      | Weighted median | 1.50(0.52,4.27)     | 0.487    |               |                    |           |
|                         |         |      |                 |                     |          | 0.014         | 0.039              | 0.069     |
|                         |         |      | MR-ML           | 1.24(0.61,2.52)     | 0.375    |               |                    |           |
|                         |         |      | Weighted mode   | 2.81(0.26,30.27)    | 0.178    |               |                    |           |
|                         |         |      | Simple mode     | 0.63(0.06,6.54)     | 0.169    |               |                    |           |
|                         | LS-BMD  | 5    | IVW             | 4.01(0.16,98.98)    | 0.396    |               |                    |           |
|                         |         |      | Weighted median | 4.36(0.07,254.42)   | 0.478    |               |                    |           |
|                         |         |      | MR-ML           | 4.09(0.16,102.74)   | 0.392    | 0.567         | 0.250              | 0.590     |
|                         |         |      | Weighted mode   | 17.36(0.11,2695.82) | 0.330    |               |                    |           |
|                         |         |      | Simple mode     | 0.29(0.00,101.49)   | 0.698    |               |                    |           |
| Rarely/never            | FN-BMD  | 11   | IVW             | 2.97(1.03,8.59)     | 0.045    |               |                    |           |
|                         |         |      | Weighted median | 3.57(0.82,15.59)    | 0.076    |               |                    |           |
|                         |         |      |                 |                     |          | 0.471         | 0.769              | 0.850     |
|                         |         |      | MR-ML           | 3.03(1.02,8.97)     | 0.045    |               |                    |           |
|                         |         |      | Weighted mode   | 4.55(0.59,35.35)    | 0.192    |               |                    |           |
|                         |         |      | Simple mode     | 5.16(0.53,50.43)    | 0.184    |               |                    |           |
|                         | LS-BMD  | 11   | IVW             | 3.09(0.91,10.56)    | 0.072    |               |                    |           |
|                         |         |      | Weighted median | 3.94(0.74,21.02)    | 0.109    |               |                    |           |
|                         |         |      | MR-ML           | 3.23(0.91,11.43)    | 0.069    | 0.423         | 0.581              | 0.523     |
|                         |         |      | Weighted mode   | 10.27(0.50,211.47)  | 0.162    |               |                    |           |
|                         |         |      | Simple mode     | 11.66(0.64,210.98)  | 0.127    |               |                    |           |

SNP: single-nucleotide polymorphism; FN-BMD: femoral neck bone mineral density; LS-BMD: lumbar spine bone mineral density; OR: odds ratio; 95%CI: 95% confidence interval; IVW: inverse-variance weighted; MR-ML: mendelian randomization maximum likelihood.

**Fig S1.** Flow chart of exclusion criteria employed in the Study.

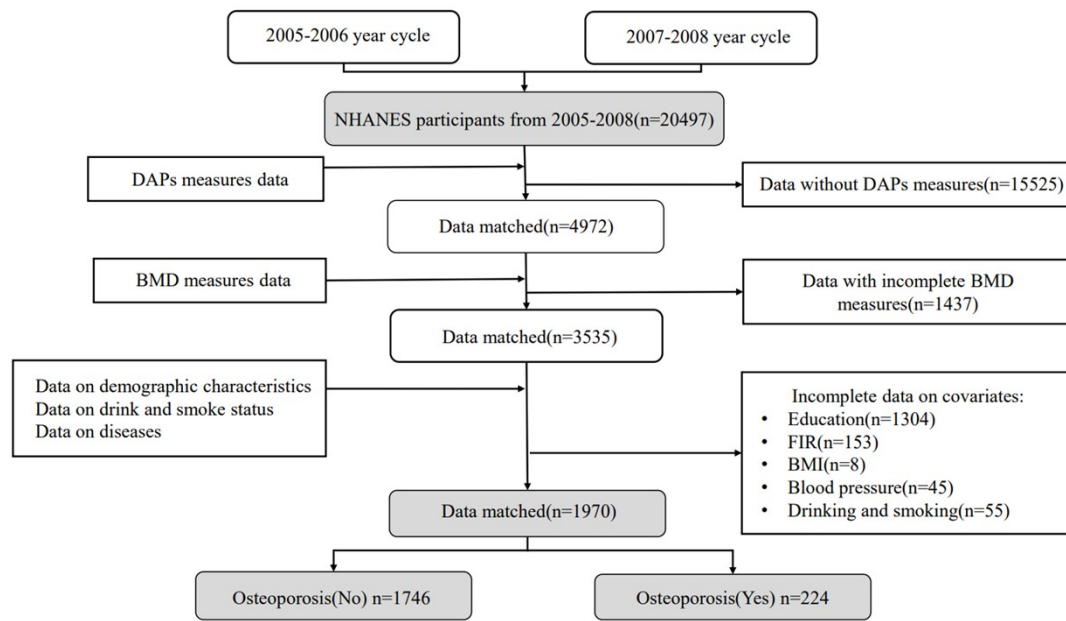

NHANES: National Health and Nutrition Examination Survey; BMD: bone mineral density;  
DAPs: dialkyl phosphates; FIR: family income to poverty ratio; BMI: body mass index.

**Fig S2.** Subgroup analysis by gender: Comparison between different models of the weighted relationship between organophosphate pesticides metabolites in urine and osteoporosis /BMD.

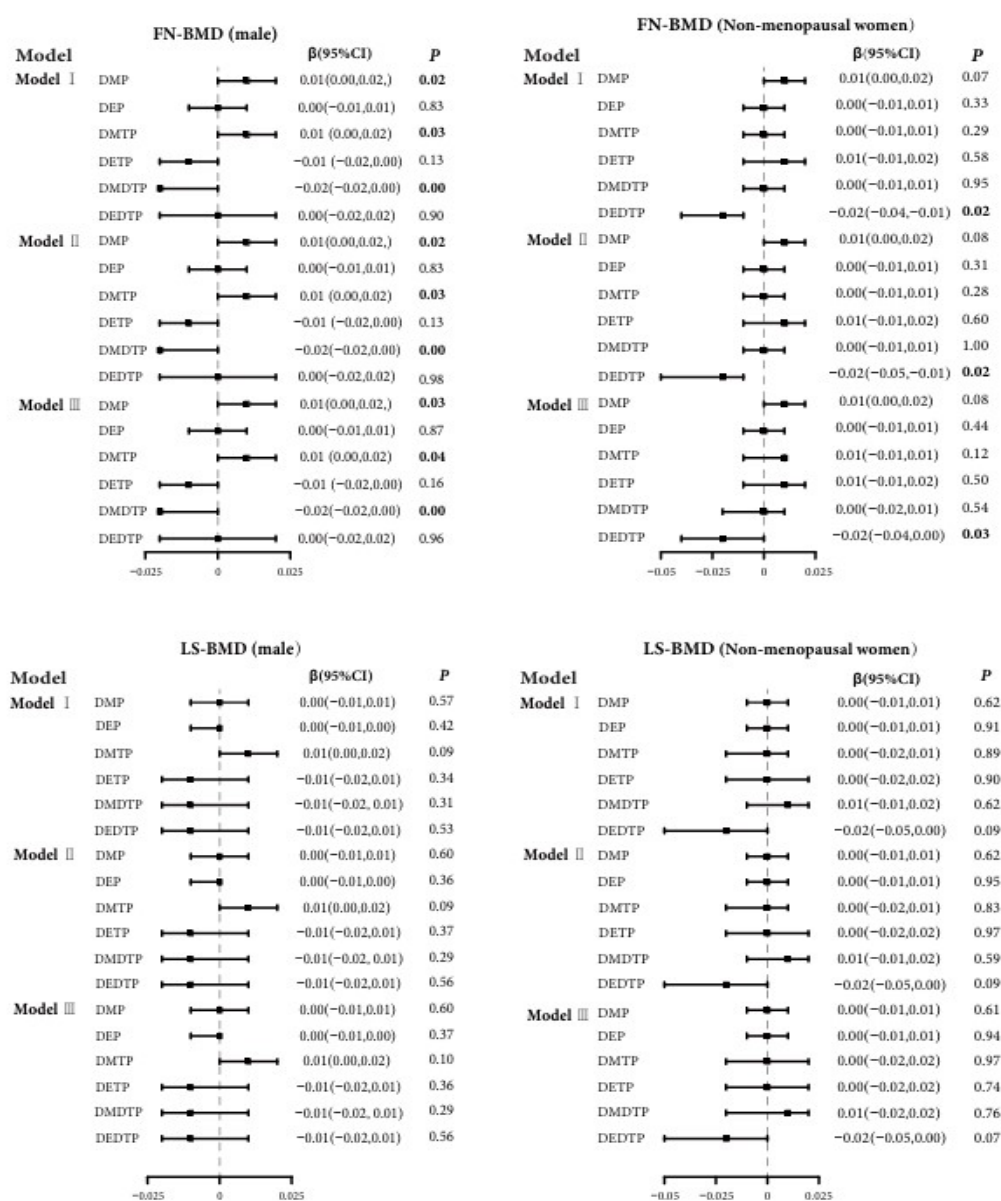

DMP: dimethyl phosphate; DMTP: dimethyl thiophosphate; DMDTP: dimethyl dithiophosphate; DEP: diethyl phosphate; DETP: diethyl thiophosphate, DEDTP: diethyl dithiophosphate; FN-BMD: femoral neck bone mineral density; LS-BMD: lumbar spine bone mineral density.

Model I: Adjusting for age, sex, race, education level, marital status, FIR, and BMI.

Model II: Model I + adjusted for smoking and drinking.

Model III: Model II + adjusted for hypertension, diabetes, and cardiovascular diseases.

**Fig S3.** Subgroup analysis by age: Comparison between different models of the weighted relationship between organophosphate pesticides metabolites in urine and osteoporosis /BMD.

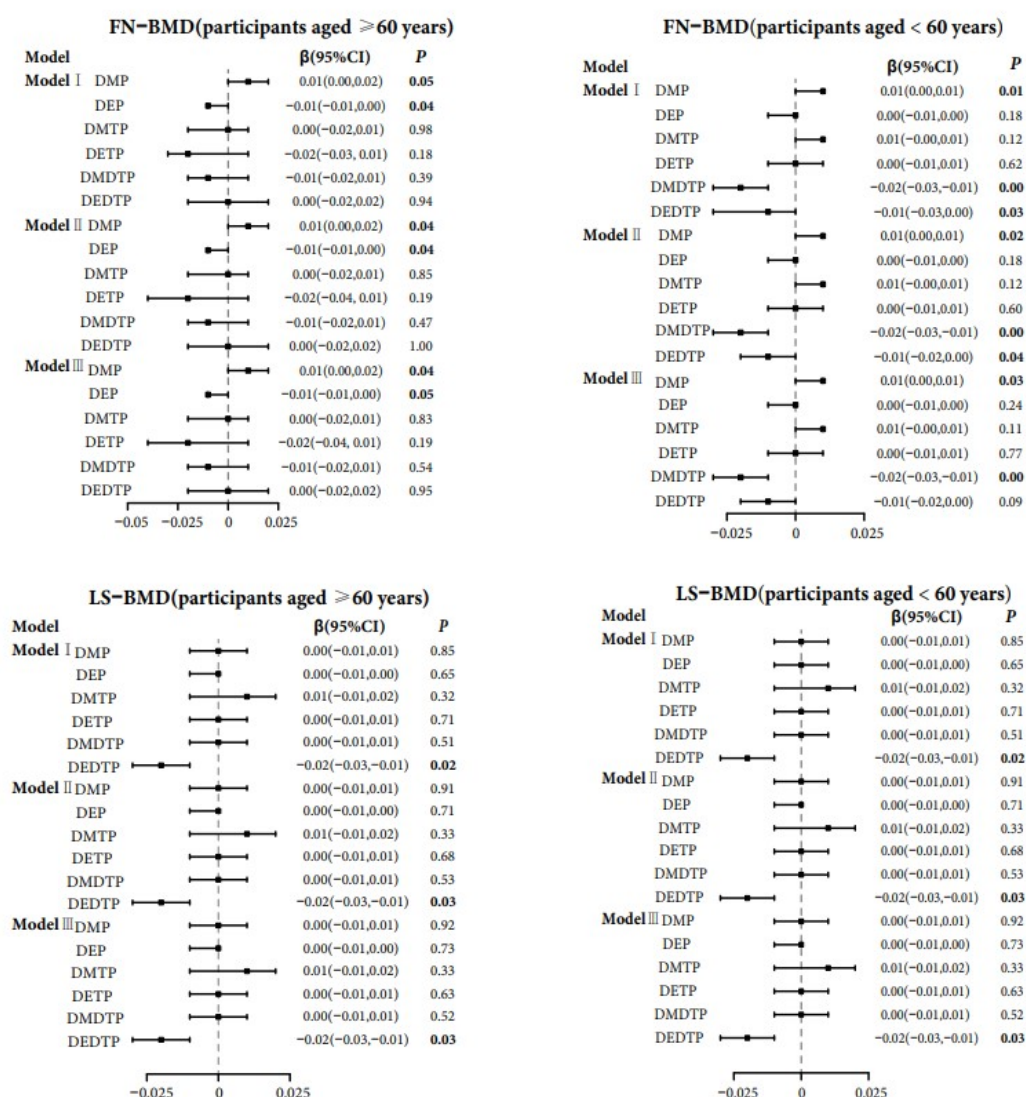

DMP: dimethyl phosphate; DMTP: dimethyl thiophosphate; DMDTP: dimethyl dithiophosphate; DEP: diethyl phosphate; DETP: diethyl thiophosphate, DEDTP: diethyl dithiophosphate; FN-BMD: femoral neck bone mineral density; LS-BMD: lumbar spine bone mineral density.

Model I: Adjusting for age, sex, race, education level, marital status, FIR, and BMI.

Model II: Model I + adjusted for smoking and drinking.

Model III: Model II + adjusted for hypertension, diabetes, and cardiovascular diseases.

**Fig S4.** Subgroup analysis by BMI: Comparison between different models of the weighted relationship between organophosphorus pesticide metabolites in urine and osteoporosis /BMD.

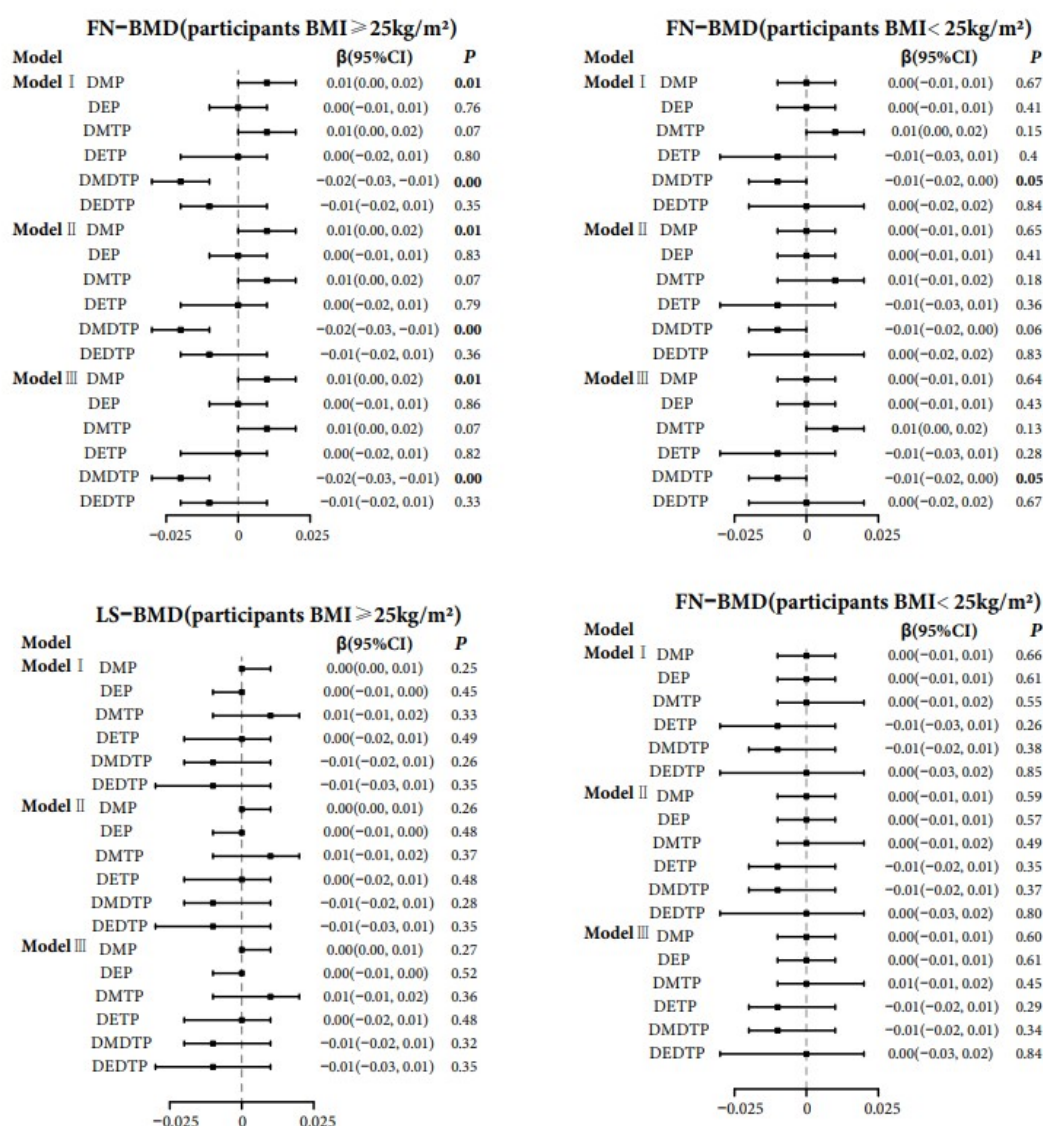

DMP: dimethyl phosphate; DMTP: dimethyl thiophosphate; DMDTP: dimethyl dithiophosphate; DEP: diethyl phosphate; DETP: diethyl thiophosphate, DEDTP: diethyl dithiophosphate; FN-BMD: femoral neck bone mineral density; LS-BMD: lumbar spine bone mineral density.

Model I: Adjusting for age, sex, race, education level, marital status, FIR, and BMI.

Model II: Model I + adjusted for smoking and drinking.

Model III: Model II + adjusted for hypertension, diabetes, and cardiovascular diseases.



**Fig S5.** Sensitivity analysis: Result of the Qgcomp model.

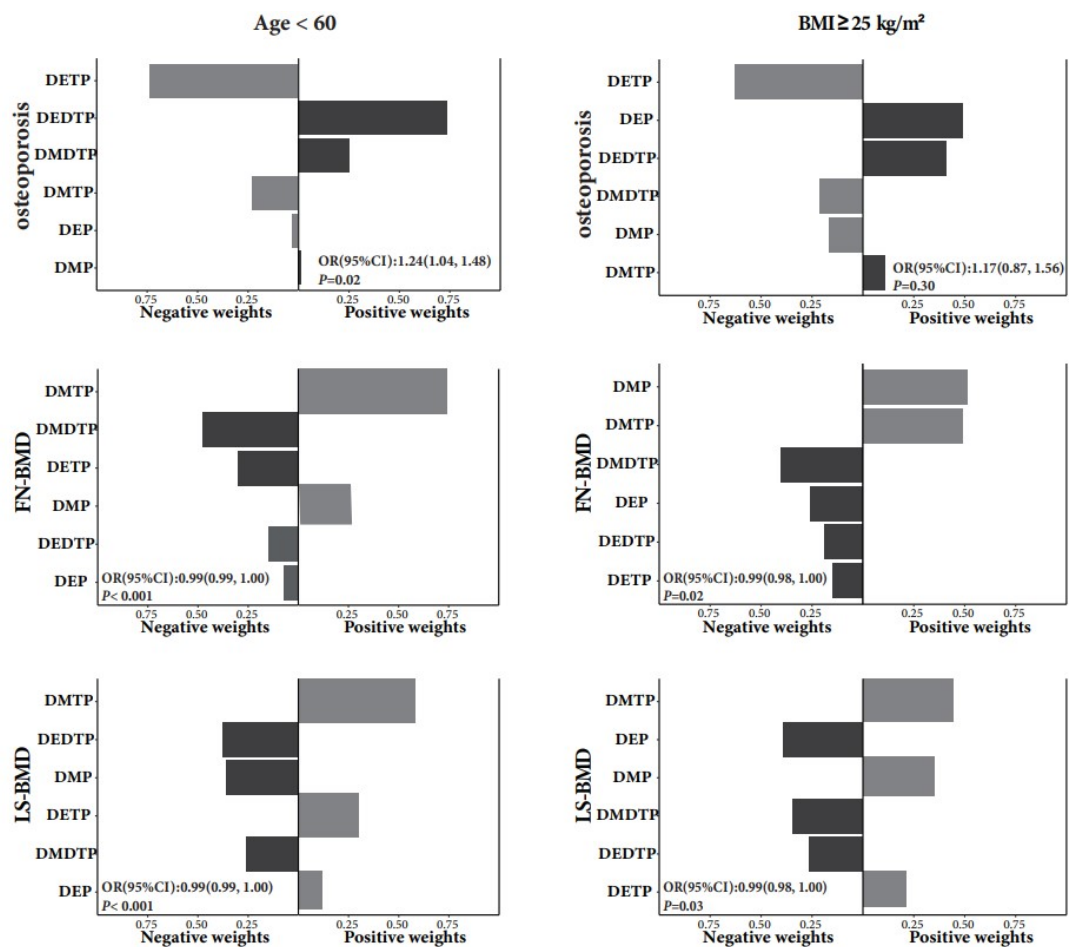

FN-BMD: femoral neck bone mineral density; LS-BMD: lumbar spine bone mineral density; DMP: dimethyl phosphate; DMTP: dimethyl thiophosphate; DMDTP: dimethyl dithiophosphate; DEP: diethyl phosphate; DETP: diethyl thiophosphate, DEDTP: diethyl dithiophosphate. OR: odds ratio; 95%CI: 95% Confidence interval.

Model was adjusted for age, sex, race, education level, marital status, FIR, BMI, smoking, drinking, diabetes, CVD, and hypertension.
